# Supplementary material for: Retention, savings and interlimb transfer of reactive gait adaptations in humans following unexpected perturbations
Source: PubMed Central journal article supplement (PMC6294781; doi:10.1038/s42003-018-0238-9), 2018-12-14
Supplement: 42003_2018_238_MOESM1_ESM.pdf [file 42003_2018_238_MOESM1_ESM.pdf]

**Supplementary Table 1.** Tukey's multiple comparison test results for Base and Pre margins of stability.

| Tukey's multiple comparisons test          | Mean Diff. (cm) | 95.00% CI of diff. (cm) | Significant? | Adjusted P Value |
|--------------------------------------------|-----------------|-------------------------|--------------|------------------|
| <b>Day 1 Base</b>                          |                 |                         |              |                  |
| Pert1 <sub>R</sub> vs. Pert2 <sub>L</sub>  | 0.0048          | -0.02653 to 0.03621     | No           | 0.9787           |
| Pert1 <sub>R</sub> vs. Pert9 <sub>L</sub>  | -0.0076         | -0.03892 to 0.02381     | No           | 0.9254           |
| Pert1 <sub>R</sub> vs. Pert10 <sub>R</sub> | -0.0030         | -0.03439 to 0.02834     | No           | 0.9946           |
| Pert2 <sub>L</sub> vs. Pert9 <sub>L</sub>  | -0.0124         | -0.04376 to 0.01897     | No           | 0.7385           |
| Pert2 <sub>L</sub> vs. Pert10 <sub>R</sub> | -0.0079         | -0.03923 to 0.0235      | No           | 0.9167           |
| Pert9 <sub>L</sub> vs. Pert10 <sub>R</sub> | 0.0045          | -0.02684 to 0.03589     | No           | 0.9824           |
| <b>Day 1 Pre</b>                           |                 |                         |              |                  |
| Pert1 <sub>R</sub> vs. Pert2 <sub>L</sub>  | 0.0044          | -0.02701 to 0.03572     | No           | 0.9843           |
| Pert1 <sub>R</sub> vs. Pert9 <sub>L</sub>  | -0.0073         | -0.03868 to 0.02405     | No           | 0.9316           |
| Pert1 <sub>R</sub> vs. Pert10 <sub>R</sub> | -0.0088         | -0.04017 to 0.02257     | No           | 0.8878           |
| Pert2 <sub>L</sub> vs. Pert9 <sub>L</sub>  | -0.0117         | -0.04304 to 0.01969     | No           | 0.7725           |
| Pert2 <sub>L</sub> vs. Pert10 <sub>R</sub> | -0.0131         | -0.04452 to 0.01821     | No           | 0.7011           |
| Pert9 <sub>L</sub> vs. Pert10 <sub>R</sub> | -0.0015         | -0.03285 to 0.02988     | No           | 0.9994           |
| <b>Day 2 Base</b>                          |                 |                         |              |                  |
| Pert1 <sub>R</sub> vs. Pert2 <sub>L</sub>  | 0.0012          | -0.02562 to 0.02796     | No           | 0.9995           |
| Pert1 <sub>R</sub> vs. Pert9 <sub>L</sub>  | -0.0066         | -0.03342 to 0.02016     | No           | 0.9196           |
| Pert1 <sub>R</sub> vs. Pert10 <sub>R</sub> | -0.0057         | -0.03247 to 0.02111     | No           | 0.9474           |
| Pert2 <sub>L</sub> vs. Pert9 <sub>L</sub>  | -0.0078         | -0.03459 to 0.01899     | No           | 0.8764           |
| Pert2 <sub>L</sub> vs. Pert10 <sub>R</sub> | -0.0068         | -0.03364 to 0.01994     | No           | 0.9123           |
| Pert9 <sub>L</sub> vs. Pert10 <sub>R</sub> | 0.0010          | -0.02584 to 0.02774     | No           | 0.9997           |
| <b>Day 2 Pre</b>                           |                 |                         |              |                  |
| Pert1 <sub>R</sub> vs. Pert2 <sub>L</sub>  | 0.0142          | -0.01262 to 0.04096     | No           | 0.5229           |
| Pert1 <sub>R</sub> vs. Pert9 <sub>L</sub>  | -0.0024         | -0.02916 to 0.02443     | No           | 0.9958           |
| Pert1 <sub>R</sub> vs. Pert10 <sub>R</sub> | -0.0039         | -0.03072 to 0.02286     | No           | 0.9815           |
| Pert2 <sub>L</sub> vs. Pert9 <sub>L</sub>  | -0.0165         | -0.04333 to 0.01026     | No           | 0.3845           |
| Pert2 <sub>L</sub> vs. Pert10 <sub>R</sub> | -0.0181         | -0.04489 to 0.008693    | No           | 0.3032           |
| Pert9 <sub>L</sub> vs. Pert10 <sub>R</sub> | -0.0016         | -0.02836 to 0.02523     | No           | 0.9988           |

**Supplementary Table 2.** Tukey's multiple comparison test results (step comparisons) for margins of stability during perturbation recovery on Day 1.

| Tukey's multiple comparisons test | Mean Diff. (cm) | 95.00% CI of diff. (cm) | Significant? | Adjusted P Value |
|-----------------------------------|-----------------|-------------------------|--------------|------------------|
| <b>Pert1<sub>R</sub></b>          |                 |                         |              |                  |
| Base vs. Pre                      | 0.0017          | -0.03696 to 0.04039     | No           | >0.9999          |
| Base vs. Post1                    | 0.0746          | 0.03596 to 0.1133       | Yes          | <0.0001          |
| Base vs. Post2                    | 0.0856          | 0.04695 to 0.1243       | Yes          | <0.0001          |
| Base vs. Post3                    | 0.1139          | 0.07519 to 0.1525       | Yes          | <0.0001          |
| Base vs. Post4                    | 0.1032          | 0.06451 to 0.1419       | Yes          | <0.0001          |
| Base vs. Post5                    | 0.0515          | 0.01287 to 0.09023      | Yes          | 0.0011           |
| Base vs. Post6                    | 0.0275          | -0.01116 to 0.06619     | No           | 0.4163           |
| Base vs. Post7                    | 0.0171          | -0.0216 to 0.05576      | No           | 0.9257           |
| Base vs. Post8                    | 0.0080          | -0.03071 to 0.04665     | No           | 0.9997           |
| <b>Pert2<sub>L</sub></b>          |                 |                         |              |                  |
| Base vs. Pre                      | 0.0012          | -0.03745 to 0.03991     | No           | >0.9999          |
| Base vs. Post1                    | 0.0690          | 0.03032 to 0.1077       | Yes          | <0.0001          |
| Base vs. Post2                    | 0.0763          | 0.0376 to 0.1149        | Yes          | <0.0001          |
| Base vs. Post3                    | 0.0920          | 0.05332 to 0.1307       | Yes          | <0.0001          |
| Base vs. Post4                    | 0.0921          | 0.05345 to 0.1308       | Yes          | <0.0001          |
| Base vs. Post5                    | 0.0465          | 0.007785 to 0.08514     | Yes          | 0.0059           |
| Base vs. Post6                    | 0.0189          | -0.01978 to 0.05757     | No           | 0.8696           |
| Base vs. Post7                    | -0.0053         | -0.04401 to 0.03334     | No           | >0.9999          |
| Base vs. Post8                    | 0.0056          | -0.03308 to 0.04427     | No           | >0.9999          |
| <b>Pert9<sub>L</sub></b>          |                 |                         |              |                  |
| Base vs. Pre                      | 0.0020          | -0.03672 to 0.04063     | No           | >0.9999          |
| Base vs. Post1                    | 0.1191          | 0.08043 to 0.1578       | Yes          | <0.0001          |
| Base vs. Post2                    | 0.0743          | 0.03563 to 0.113        | Yes          | <0.0001          |
| Base vs. Post3                    | 0.0541          | 0.01537 to 0.09272      | Yes          | 0.0005           |
| Base vs. Post4                    | 0.0482          | 0.009499 to 0.08685     | Yes          | 0.0034           |
| Base vs. Post5                    | 0.0204          | -0.01826 to 0.0591      | No           | 0.8071           |
| Base vs. Post6                    | 0.0066          | -0.03207 to 0.04529     | No           | >0.9999          |
| Base vs. Post7                    | -0.0008         | -0.03951 to 0.03785     | No           | >0.9999          |
| Base vs. Post8                    | 0.0000          | -0.03866 to 0.03869     | No           | >0.9999          |
| <b>Pert10<sub>R</sub></b>         |                 |                         |              |                  |
| Base vs. Pre                      | -0.0041         | -0.04273 to 0.03462     | No           | >0.9999          |
| Base vs. Post1                    | 0.1018          | 0.06307 to 0.1404       | Yes          | <0.0001          |
| Base vs. Post2                    | 0.0964          | 0.05776 to 0.1351       | Yes          | <0.0001          |
| Base vs. Post3                    | 0.0943          | 0.05568 to 0.133        | Yes          | <0.0001          |
| Base vs. Post4                    | 0.0883          | 0.04961 to 0.127        | Yes          | <0.0001          |
| Base vs. Post5                    | 0.0446          | 0.005905 to 0.08326     | Yes          | 0.0103           |
| Base vs. Post6                    | 0.0109          | -0.02775 to 0.0496      | No           | 0.9965           |
| Base vs. Post7                    | 0.0007          | -0.03793 to 0.03942     | No           | >0.9999          |
| Base vs. Post8                    | -0.0087         | -0.04742 to 0.02993     | No           | 0.9994           |

**Supplementary Table 3.** Tukey's multiple comparison test results (step comparisons) for margins of stability during perturbation recovery on Day 2.

| Tukey's multiple comparisons test | Mean Diff. (cm) | 95.00% CI of diff. (cm) | Significant? | Adjusted P Value |
|-----------------------------------|-----------------|-------------------------|--------------|------------------|
| <b>Pert1<sub>R</sub></b>          |                 |                         |              |                  |
| Base vs. Pre                      | -0.0046         | -0.03759 to 0.02849     | No           | >0.9999          |
| Base vs. Post1                    | 0.0987          | 0.06567 to 0.1317       | Yes          | <0.0001          |
| Base vs. Post2                    | 0.1183          | 0.08531 to 0.1514       | Yes          | <0.0001          |
| Base vs. Post3                    | 0.1013          | 0.06826 to 0.1343       | Yes          | <0.0001          |
| Base vs. Post4                    | 0.0760          | 0.04298 to 0.1091       | Yes          | <0.0001          |
| Base vs. Post5                    | 0.0290          | -0.004059 to 0.06202    | No           | 0.1433           |
| Base vs. Post6                    | 0.0093          | -0.02379 to 0.04229     | No           | 0.9967           |
| Base vs. Post7                    | 0.0078          | -0.02525 to 0.04082     | No           | 0.9992           |
| Base vs. Post8                    | -0.0082         | -0.0412 to 0.02487      | No           | 0.9988           |
| <b>Pert2<sub>L</sub></b>          |                 |                         |              |                  |
| Base vs. Pre                      | 0.0085          | -0.02459 to 0.04149     | No           | 0.9984           |
| Base vs. Post1                    | 0.1238          | 0.09074 to 0.1568       | Yes          | <0.0001          |
| Base vs. Post2                    | 0.0843          | 0.05126 to 0.1173       | Yes          | <0.0001          |
| Base vs. Post3                    | 0.0903          | 0.05724 to 0.1233       | Yes          | <0.0001          |
| Base vs. Post4                    | 0.0480          | 0.01494 to 0.08102      | Yes          | 0.0002           |
| Base vs. Post5                    | 0.0044          | -0.02859 to 0.03748     | No           | >0.9999          |
| Base vs. Post6                    | -0.0060         | -0.03907 to 0.02701     | No           | 0.9999           |
| Base vs. Post7                    | -0.0179         | -0.05089 to 0.01518     | No           | 0.7847           |
| Base vs. Post8                    | -0.0042         | -0.03725 to 0.02882     | No           | >0.9999          |
| <b>Pert9<sub>L</sub></b>          |                 |                         |              |                  |
| Base vs. Pre                      | -0.0003         | -0.03332 to 0.03275     | No           | >0.9999          |
| Base vs. Post1                    | 0.1439          | 0.1109 to 0.177         | Yes          | <0.0001          |
| Base vs. Post2                    | 0.0541          | 0.02107 to 0.08714      | Yes          | <0.0001          |
| Base vs. Post3                    | 0.0250          | -0.008096 to 0.05798    | No           | 0.328            |
| Base vs. Post4                    | 0.0164          | -0.01668 to 0.04939     | No           | 0.8601           |
| Base vs. Post5                    | 0.0034          | -0.02962 to 0.03646     | No           | >0.9999          |
| Base vs. Post6                    | 0.0092          | -0.0238 to 0.04227      | No           | 0.9968           |
| Base vs. Post7                    | -0.0030         | -0.03604 to 0.03003     | No           | >0.9999          |
| Base vs. Post8                    | 0.0005          | -0.03251 to 0.03357     | No           | >0.9999          |
| <b>Pert10<sub>R</sub></b>         |                 |                         |              |                  |
| Base vs. Pre                      | -0.0028         | -0.03584 to 0.03024     | No           | >0.9999          |
| Base vs. Post1                    | 0.1116          | 0.07857 to 0.1446       | Yes          | <0.0001          |
| Base vs. Post2                    | 0.0548          | 0.02181 to 0.08789      | Yes          | <0.0001          |
| Base vs. Post3                    | 0.0520          | 0.01897 to 0.08505      | Yes          | <0.0001          |
| Base vs. Post4                    | 0.0514          | 0.01837 to 0.08445      | Yes          | <0.0001          |
| Base vs. Post5                    | 0.0077          | -0.02535 to 0.04073     | No           | 0.9992           |
| Base vs. Post6                    | 0.0056          | -0.02747 to 0.0386      | No           | >0.9999          |
| Base vs. Post7                    | -0.0003         | -0.03335 to 0.03273     | No           | >0.9999          |
| Base vs. Post8                    | 0.0011          | -0.03196 to 0.03412     | No           | >0.9999          |

**Supplementary Table 4.** Tukey’s multiple comparison test results (comparing perturbations to the right leg) for margins of stability during perturbation recovery on Day 1.

| <b>Tukey's multiple comparisons test</b>        | <b>Mean Diff. (cm)</b> | <b>95.00% CI of diff. (cm)</b> | <b>Significant?</b> | <b>Adjusted P Value</b> |
|-------------------------------------------------|------------------------|--------------------------------|---------------------|-------------------------|
| <b>Pert1<sub>R</sub> vs. Pert10<sub>R</sub></b> |                        |                                |                     |                         |
| <b>Base</b>                                     | -0.0030                | -0.03439 to 0.02834            | No                  | 0.9946                  |
| <b>Pre</b>                                      | -0.0088                | -0.04017 to 0.02257            | No                  | 0.8878                  |
| <b>Post1</b>                                    | 0.0241                 | -0.007284 to 0.05545           | No                  | 0.1972                  |
| <b>Post2</b>                                    | 0.0078                 | -0.02359 to 0.03915            | No                  | 0.9192                  |
| <b>Post3</b>                                    | -0.0225                | -0.05391 to 0.008823           | No                  | 0.25                    |
| <b>Post4</b>                                    | -0.0179                | -0.0493 to 0.01344             | No                  | 0.4541                  |
| <b>Post5</b>                                    | -0.0100                | -0.04136 to 0.02137            | No                  | 0.8441                  |
| <b>Post6</b>                                    | -0.0196                | -0.05098 to 0.01175            | No                  | 0.3725                  |
| <b>Post7</b>                                    | -0.0194                | -0.05073 to 0.012              | No                  | 0.3842                  |
| <b>Post8</b>                                    | -0.0197                | -0.05111 to 0.01162            | No                  | 0.3667                  |

**Supplementary Table 5.** Tukey's multiple comparison test results (comparing perturbations to the right leg) for margins of stability during perturbation recovery on Day 2.

| Tukey's multiple comparisons test               | Mean Diff. (cm) | 95.00% CI of diff. (cm) | Significant? | Adjusted P Value |
|-------------------------------------------------|-----------------|-------------------------|--------------|------------------|
| <b>Pert1<sub>R</sub> vs. Pert10<sub>R</sub></b> |                 |                         |              |                  |
| <b>Base</b>                                     | -0.0057         | -0.03247 to 0.02111     | No           | 0.9474           |
| <b>Pre</b>                                      | -0.0039         | -0.03072 to 0.02286     | No           | 0.9815           |
| <b>Post1</b>                                    | 0.0072          | -0.01958 to 0.03401     | No           | 0.8992           |
| <b>Post2</b>                                    | -0.0692         | -0.09597 to -0.04239    | Yes          | <0.0001          |
| <b>Post3</b>                                    | -0.0550         | -0.08175 to -0.02817    | Yes          | <0.0001          |
| <b>Post4</b>                                    | -0.0303         | -0.05708 to -0.003496   | Yes          | 0.0195           |
| <b>Post5</b>                                    | -0.0270         | -0.05376 to -0.000176   | Yes          | 0.0478           |
| <b>Post6</b>                                    | -0.0094         | -0.03616 to 0.01743     | No           | 0.8042           |
| <b>Post7</b>                                    | -0.0138         | -0.04057 to 0.01302     | No           | 0.5472           |
| <b>Post8</b>                                    | 0.0036          | -0.02323 to 0.03036     | No           | 0.9861           |

**Supplementary Table 6.** Bonferroni's multiple comparison test results for margins of stability following the first perturbation to the left lower limb on each day.

| <b>Bonferroni's multiple comparisons test</b>            | <b>Mean Diff. (cm)</b> | <b>95.00% CI of diff. (cm)</b> | <b>Significant?</b> | <b>Adjusted P Value</b> |
|----------------------------------------------------------|------------------------|--------------------------------|---------------------|-------------------------|
| <b>Day 1 Pert2<sub>L</sub> - Day 2 Pert2<sub>L</sub></b> |                        |                                |                     |                         |
| <b>Base</b>                                              | -0.0068                | -0.04848 to 0.03482            | No                  | >0.9999                 |
| <b>Pre</b>                                               | 0.0004                 | -0.04126 to 0.04204            | No                  | >0.9999                 |
| <b>Post1</b>                                             | 0.0479                 | 0.006305 to 0.0896             | Yes                 | 0.0126                  |
| <b>Post2</b>                                             | 0.0012                 | -0.04045 to 0.04284            | No                  | >0.9999                 |
| <b>Post3</b>                                             | -0.0085                | -0.0502 to 0.0331              | No                  | >0.9999                 |
| <b>Post4</b>                                             | -0.0510                | -0.09263 to -0.009332          | Yes                 | 0.0061                  |
| <b>Post5</b>                                             | -0.0488                | -0.0905 to -0.007202           | Yes                 | 0.0102                  |
| <b>Post6</b>                                             | -0.0317                | -0.0734 to 0.009895            | No                  | 0.3193                  |
| <b>Post7</b>                                             | -0.0194                | -0.06101 to 0.02229            | No                  | >0.9999                 |
| <b>Post8</b>                                             | -0.0166                | -0.05829 to 0.02501            | No                  | >0.9999                 |

**Supplementary Table 7.** Bonferroni's multiple comparison test results for margins of stability following all 10 perturbations on each day.

| Bonferroni's multiple comparisons test | Day 1           |                         |              |                  | Day 2           |                         |              |                  |
|----------------------------------------|-----------------|-------------------------|--------------|------------------|-----------------|-------------------------|--------------|------------------|
|                                        | Mean Diff. (cm) | 95.00% CI of diff. (cm) | Significant? | Adjusted P Value | Mean Diff. (cm) | 95.00% CI of diff. (cm) | Significant? | Adjusted P Value |
| <b>Pert1<sub>R</sub></b>               |                 |                         |              |                  |                 |                         |              |                  |
| Base vs. Pre                           | 0.0017          | -0.03333 to 0.03676     | No           | >0.9999          | -0.0046         | -0.03453 to 0.02543     | No           | >0.9999          |
| Base vs. Post1                         | 0.0746          | 0.0396 to 0.1097        | Yes          | <0.0001          | 0.0987          | 0.06873 to 0.1287       | Yes          | <0.0001          |
| Base vs. Post2                         | 0.0856          | 0.05059 to 0.1207       | Yes          | <0.0001          | 0.1183          | 0.08837 to 0.1483       | Yes          | <0.0001          |
| Base vs. Post3                         | 0.1139          | 0.07883 to 0.1489       | Yes          | <0.0001          | 0.1013          | 0.07132 to 0.1313       | Yes          | <0.0001          |
| Base vs. Post4                         | 0.1032          | 0.06814 to 0.1382       | Yes          | <0.0001          | 0.0760          | 0.04604 to 0.106        | Yes          | <0.0001          |
| Base vs. Post5                         | 0.0515          | 0.01651 to 0.08659      | Yes          | <0.0001          | 0.0290          | -0.0009996 to 0.05896   | No           | 0.0729           |
| Base vs. Post6                         | 0.0275          | -0.007531 to 0.06255    | No           | 0.4685           | 0.0093          | -0.02073 to 0.03923     | No           | >0.9999          |
| Base vs. Post7                         | 0.0171          | -0.01796 to 0.05212     | No           | >0.9999          | 0.0078          | -0.02219 to 0.03776     | No           | >0.9999          |
| Base vs. Post8                         | 0.0080          | -0.02707 to 0.04301     | No           | >0.9999          | -0.0082         | -0.03814 to 0.02181     | No           | >0.9999          |
| <b>Pert2<sub>L</sub></b>               |                 |                         |              |                  |                 |                         |              |                  |
| Base vs. Pre                           | 0.0012          | -0.03381 to 0.03627     | No           | >0.9999          | 0.0085          | -0.02153 to 0.03843     | No           | >0.9999          |
| Base vs. Post1                         | 0.0690          | 0.03395 to 0.104        | Yes          | <0.0001          | 0.1238          | 0.0938 to 0.1538        | Yes          | <0.0001          |
| Base vs. Post2                         | 0.0763          | 0.04123 to 0.1113       | Yes          | <0.0001          | 0.0843          | 0.05432 to 0.1143       | Yes          | <0.0001          |
| Base vs. Post3                         | 0.0920          | 0.05695 to 0.127        | Yes          | <0.0001          | 0.0903          | 0.0603 to 0.1203        | Yes          | <0.0001          |
| Base vs. Post4                         | 0.0921          | 0.05708 to 0.1272       | Yes          | <0.0001          | 0.0480          | 0.018 to 0.07796        | Yes          | <0.0001          |
| Base vs. Post5                         | 0.0465          | 0.01142 to 0.0815       | Yes          | 0.0007           | 0.0044          | -0.02554 to 0.03442     | No           | >0.9999          |
| Base vs. Post6                         | 0.0189          | -0.01615 to 0.05394     | No           | >0.9999          | -0.0060         | -0.03601 to 0.02395     | No           | >0.9999          |
| Base vs. Post7                         | -0.0053         | -0.04037 to 0.02971     | No           | >0.9999          | -0.0179         | -0.04783 to 0.01212     | No           | >0.9999          |
| Base vs. Post8                         | 0.0056          | -0.02945 to 0.04064     | No           | >0.9999          | -0.0042         | -0.03419 to 0.02576     | No           | >0.9999          |
| <b>Pert3<sub>L</sub></b>               |                 |                         |              |                  |                 |                         |              |                  |
| Base vs. Pre                           | 0.0046          | -0.03047 to 0.03961     | No           | >0.9999          | 0.0034          | -0.02656 to 0.0334      | No           | >0.9999          |
| Base vs. Post1                         | 0.0968          | 0.06175 to 0.1318       | Yes          | <0.0001          | 0.1285          | 0.09848 to 0.1584       | Yes          | <0.0001          |
| Base vs. Post2                         | 0.0521          | 0.01708 to 0.08716      | Yes          | <0.0001          | 0.0689          | 0.03894 to 0.09889      | Yes          | <0.0001          |
| Base vs. Post3                         | 0.0481          | 0.01305 to 0.08313      | Yes          | 0.0004           | 0.0525          | 0.02256 to 0.08252      | Yes          | <0.0001          |
| Base vs. Post4                         | 0.0594          | 0.02436 to 0.09444      | Yes          | <0.0001          | 0.0290          | -0.001018 to 0.05894    | No           | 0.0734           |

Supplementary Information for McCrum et al. Retention, savings and interlimb transfer of reactive gait adaptations following unexpected perturbations. *Communications Biology*.

|                          |         |                     |     |         |         |                      |     |         |
|--------------------------|---------|---------------------|-----|---------|---------|----------------------|-----|---------|
| <b>Base vs. Post5</b>    | 0.0222  | -0.01288 to 0.05721 | No  | >0.9999 | -0.0017 | -0.03172 to 0.02824  | No  | >0.9999 |
| <b>Base vs. Post6</b>    | 0.0040  | -0.03102 to 0.03906 | No  | >0.9999 | 0.0007  | -0.02924 to 0.03072  | No  | >0.9999 |
| <b>Base vs. Post7</b>    | -0.0059 | -0.04096 to 0.02913 | No  | >0.9999 | -0.0046 | -0.03458 to 0.02537  | No  | >0.9999 |
| <b>Base vs. Post8</b>    | 0.0034  | -0.03164 to 0.03844 | No  | >0.9999 | -0.0024 | -0.03241 to 0.02754  | No  | >0.9999 |
| <b>Pert4<sub>L</sub></b> |         |                     |     |         |         |                      |     |         |
| <b>Base vs. Pre</b>      | 0.0117  | -0.02337 to 0.04671 | No  | >0.9999 | 0.0064  | -0.02353 to 0.03643  | No  | >0.9999 |
| <b>Base vs. Post1</b>    | 0.0887  | 0.05371 to 0.1238   | Yes | <0.0001 | 0.1305  | 0.1005 to 0.1605     | Yes | <0.0001 |
| <b>Base vs. Post2</b>    | 0.0532  | 0.01817 to 0.08826  | Yes | <0.0001 | 0.0667  | 0.03673 to 0.09668   | Yes | <0.0001 |
| <b>Base vs. Post3</b>    | 0.0458  | 0.01073 to 0.08081  | Yes | 0.0009  | 0.0504  | 0.02042 to 0.08037   | Yes | <0.0001 |
| <b>Base vs. Post4</b>    | 0.0477  | 0.01267 to 0.08275  | Yes | 0.0004  | 0.0268  | -0.003183 to 0.05677 | No  | 0.1597  |
| <b>Base vs. Post5</b>    | 0.0126  | -0.02243 to 0.04766 | No  | >0.9999 | -0.0003 | -0.03027 to 0.02969  | No  | >0.9999 |
| <b>Base vs. Post6</b>    | 0.0132  | -0.02188 to 0.0482  | No  | >0.9999 | 0.0008  | -0.0292 to 0.03076   | No  | >0.9999 |
| <b>Base vs. Post7</b>    | -0.0079 | -0.0429 to 0.02719  | No  | >0.9999 | -0.0116 | -0.04154 to 0.01841  | No  | >0.9999 |
| <b>Base vs. Post8</b>    | 0.0044  | -0.03064 to 0.03944 | No  | >0.9999 | 0.0001  | -0.02988 to 0.03008  | No  | >0.9999 |
| <b>Pert5<sub>L</sub></b> |         |                     |     |         |         |                      |     |         |
| <b>Base vs. Pre</b>      | 0.0071  | -0.0279 to 0.04218  | No  | >0.9999 | 0.0069  | -0.02303 to 0.03693  | No  | >0.9999 |
| <b>Base vs. Post1</b>    | 0.1179  | 0.08282 to 0.1529   | Yes | <0.0001 | 0.1207  | 0.09077 to 0.1507    | Yes | <0.0001 |
| <b>Base vs. Post2</b>    | 0.0606  | 0.02553 to 0.09562  | Yes | <0.0001 | 0.0704  | 0.04042 to 0.1004    | Yes | <0.0001 |
| <b>Base vs. Post3</b>    | 0.0399  | 0.004912 to 0.075   | Yes | 0.0091  | 0.0431  | 0.01313 to 0.07309   | Yes | 0.0001  |
| <b>Base vs. Post4</b>    | 0.0365  | 0.00145 to 0.07154  | Yes | 0.0309  | 0.0241  | -0.005919 to 0.05404 | No  | 0.3972  |
| <b>Base vs. Post5</b>    | 0.0105  | -0.0245 to 0.04558  | No  | >0.9999 | -0.0065 | -0.03643 to 0.02353  | No  | >0.9999 |
| <b>Base vs. Post6</b>    | 0.0078  | -0.02727 to 0.04281 | No  | >0.9999 | 0.0008  | -0.02922 to 0.03073  | No  | >0.9999 |
| <b>Base vs. Post7</b>    | -0.0046 | -0.03969 to 0.03039 | No  | >0.9999 | -0.0007 | -0.03071 to 0.02925  | No  | >0.9999 |
| <b>Base vs. Post8</b>    | 0.0094  | -0.02559 to 0.04449 | No  | >0.9999 | 0.0093  | -0.02072 to 0.03923  | No  | >0.9999 |
| <b>Pert6<sub>L</sub></b> |         |                     |     |         |         |                      |     |         |
| <b>Base vs. Pre</b>      | 0.0069  | -0.02811 to 0.04198 | No  | >0.9999 | 0.0067  | -0.02326 to 0.03669  | No  | >0.9999 |
| <b>Base vs. Post1</b>    | 0.0921  | 0.05703 to 0.1271   | Yes | <0.0001 | 0.1174  | 0.08741 to 0.1474    | Yes | <0.0001 |
| <b>Base vs. Post2</b>    | 0.0635  | 0.02842 to 0.09851  | Yes | <0.0001 | 0.0568  | 0.02684 to 0.0868    | Yes | <0.0001 |
| <b>Base vs. Post3</b>    | 0.0447  | 0.009626 to 0.07971 | Yes | 0.0015  | 0.0213  | -0.008695 to 0.05126 | No  | 0.9221  |
| <b>Base vs. Post4</b>    | 0.0445  | 0.009456 to 0.07954 | Yes | 0.0016  | 0.0145  | -0.01547 to 0.04448  | No  | >0.9999 |



Supplementary Information for McCrum et al. Retention, savings and interlimb transfer of reactive gait adaptations following unexpected perturbations. *Communications Biology*.

|                          |         |                     |     |         |         |                      |     |         |
|--------------------------|---------|---------------------|-----|---------|---------|----------------------|-----|---------|
| <b>Base vs. Post5</b>    | 0.0066  | -0.02847 to 0.04162 | No  | >0.9999 | -0.0065 | -0.03651 to 0.02345  | No  | >0.9999 |
| <b>Base vs. Post6</b>    | 0.0009  | -0.03412 to 0.03597 | No  | >0.9999 | 0.0013  | -0.02863 to 0.03133  | No  | >0.9999 |
| <b>Base vs. Post7</b>    | -0.0063 | -0.04133 to 0.02876 | No  | >0.9999 | -0.0074 | -0.0374 to 0.02256   | No  | >0.9999 |
| <b>Base vs. Post8</b>    | -0.0030 | -0.03809 to 0.032   | No  | >0.9999 | 0.0009  | -0.02906 to 0.0309   | No  | >0.9999 |
| <b>Pert7<sub>L</sub></b> |         |                     |     |         |         |                      |     |         |
| <b>Base vs. Pre</b>      | 0.0010  | -0.02507 to 0.04502 | No  | >0.9999 | 0.0090  | -0.02093 to 0.03903  | No  | >0.9999 |
| <b>Base vs. Post1</b>    | 0.1019  | 0.06684 to 0.1369   | Yes | <0.0001 | 0.1325  | 0.1026 to 0.1625     | Yes | <0.0001 |
| <b>Base vs. Post2</b>    | 0.0860  | 0.05095 to 0.121    | Yes | <0.0001 | 0.0534  | 0.02343 to 0.08338   | Yes | <0.0001 |
| <b>Base vs. Post3</b>    | 0.0620  | 0.02698 to 0.09707  | Yes | <0.0001 | 0.0260  | -0.003998 to 0.05596 | No  | 0.2113  |
| <b>Base vs. Post4</b>    | 0.0555  | 0.02044 to 0.09052  | Yes | <0.0001 | 0.0201  | -0.009908 to 0.05005 | No  | >0.9999 |
| <b>Base vs. Post5</b>    | 0.0052  | -0.02988 to 0.04021 | No  | >0.9999 | -0.0027 | -0.0327 to 0.02725   | No  | >0.9999 |
| <b>Base vs. Post6</b>    | 0.0020  | -0.03309 to 0.037   | No  | >0.9999 | 0.0003  | -0.02969 to 0.03026  | No  | >0.9999 |
| <b>Base vs. Post7</b>    | -0.0019 | -0.03699 to 0.0331  | No  | >0.9999 | -0.0098 | -0.03982 to 0.02013  | No  | >0.9999 |
| <b>Base vs. Post8</b>    | 0.0048  | -0.03024 to 0.03985 | No  | >0.9999 | -0.0043 | -0.03423 to 0.02572  | No  | >0.9999 |
| <b>Pert8<sub>L</sub></b> |         |                     |     |         |         |                      |     |         |
| <b>Base vs. Pre</b>      | 0.0090  | -0.02607 to 0.04402 | No  | >0.9999 | 0.0058  | -0.02418 to 0.03577  | No  | >0.9999 |
| <b>Base vs. Post1</b>    | 0.1122  | 0.07718 to 0.1473   | Yes | <0.0001 | 0.1215  | 0.09149 to 0.1514    | Yes | <0.0001 |
| <b>Base vs. Post2</b>    | 0.0852  | 0.05014 to 0.1202   | Yes | <0.0001 | 0.0755  | 0.0455 to 0.1055     | Yes | <0.0001 |
| <b>Base vs. Post3</b>    | 0.0641  | 0.02911 to 0.0992   | Yes | <0.0001 | 0.0450  | 0.01499 to 0.07495   | Yes | <0.0001 |
| <b>Base vs. Post4</b>    | 0.0407  | 0.005665 to 0.07575 | Yes | 0.0069  | 0.0269  | -0.003094 to 0.05686 | No  | 0.1549  |
| <b>Base vs. Post5</b>    | 0.0086  | -0.02639 to 0.04369 | No  | >0.9999 | 0.0046  | -0.0254 to 0.03456   | No  | >0.9999 |
| <b>Base vs. Post6</b>    | 0.0007  | -0.03435 to 0.03573 | No  | >0.9999 | 0.0026  | -0.02737 to 0.03259  | No  | >0.9999 |
| <b>Base vs. Post7</b>    | -0.0030 | -0.03802 to 0.03207 | No  | >0.9999 | -0.0153 | -0.04533 to 0.01463  | No  | >0.9999 |
| <b>Base vs. Post8</b>    | 0.0053  | -0.02974 to 0.04034 | No  | >0.9999 | -0.0019 | -0.03185 to 0.0281   | No  | >0.9999 |
| <b>Pert9<sub>L</sub></b> |         |                     |     |         |         |                      |     |         |
| <b>Base vs. Pre</b>      | 0.0020  | -0.03309 to 0.03699 | No  | >0.9999 | -0.0003 | -0.03027 to 0.02969  | No  | >0.9999 |
| <b>Base vs. Post1</b>    | 0.1191  | 0.08407 to 0.1542   | Yes | <0.0001 | 0.1439  | 0.1139 to 0.1739     | Yes | <0.0001 |
| <b>Base vs. Post2</b>    | 0.0743  | 0.03927 to 0.1094   | Yes | <0.0001 | 0.0541  | 0.02413 to 0.08408   | Yes | <0.0001 |
| <b>Base vs. Post3</b>    | 0.0540  | 0.019 to 0.08909    | Yes | <0.0001 | 0.0250  | -0.005036 to 0.05492 | No  | 0.2986  |
| <b>Base vs. Post4</b>    | 0.0482  | 0.01313 to 0.08322  | Yes | 0.0003  | 0.0164  | -0.01362 to 0.04633  | No  | >0.9999 |

*Supplementary Information for McCrum et al. Retention, savings and interlimb transfer of reactive gait adaptations following unexpected perturbations. Communications Biology.*

|                       |         |                     |     |         |         |                     |     |         |
|-----------------------|---------|---------------------|-----|---------|---------|---------------------|-----|---------|
| <b>Base vs. Post5</b> | 0.0204  | -0.01462 to 0.05546 | No  | >0.9999 | 0.0034  | -0.02656 to 0.0334  | No  | >0.9999 |
| <b>Base vs. Post6</b> | 0.0066  | -0.02843 to 0.04165 | No  | >0.9999 | 0.0092  | -0.02074 to 0.03921 | No  | >0.9999 |
| <b>Base vs. Post7</b> | -0.0008 | -0.03587 to 0.03421 | No  | >0.9999 | -0.0030 | -0.03298 to 0.02697 | No  | >0.9999 |
| <b>Base vs. Post8</b> | 0.0000  | -0.03503 to 0.03506 | No  | >0.9999 | 0.0005  | -0.02945 to 0.03051 | No  | >0.9999 |
| <b>Pert10R</b>        |         |                     |     |         |         |                     |     |         |
| <b>Base vs. Pre</b>   | -0.0041 | -0.0391 to 0.03099  | No  | >0.9999 | -0.0028 | -0.03278 to 0.02718 | No  | >0.9999 |
| <b>Base vs. Post1</b> | 0.1018  | 0.06671 to 0.1368   | Yes | <0.0001 | 0.1116  | 0.08163 to 0.1416   | Yes | <0.0001 |
| <b>Base vs. Post2</b> | 0.0964  | 0.06139 to 0.1315   | Yes | <0.0001 | 0.0548  | 0.02487 to 0.08483  | Yes | <0.0001 |
| <b>Base vs. Post3</b> | 0.0943  | 0.05931 to 0.1294   | Yes | <0.0001 | 0.0520  | 0.02203 to 0.08199  | Yes | <0.0001 |
| <b>Base vs. Post4</b> | 0.0883  | 0.05324 to 0.1233   | Yes | <0.0001 | 0.0514  | 0.02143 to 0.08139  | Yes | <0.0001 |
| <b>Base vs. Post5</b> | 0.0446  | 0.009539 to 0.07962 | Yes | 0.0015  | 0.0077  | -0.02229 to 0.03767 | No  | >0.9999 |
| <b>Base vs. Post6</b> | 0.0109  | -0.02412 to 0.04597 | No  | >0.9999 | 0.0056  | -0.02441 to 0.03555 | No  | >0.9999 |
| <b>Base vs. Post7</b> | 0.0007  | -0.0343 to 0.03579  | No  | >0.9999 | -0.0003 | -0.03029 to 0.02967 | No  | >0.9999 |
| <b>Base vs. Post8</b> | -0.0087 | -0.04379 to 0.0263  | No  | >0.9999 | 0.0011  | -0.0289 to 0.03106  | No  | >0.9999 |
